# Supplementary material for: Multilevel Job Demands and Resources: Cross-Level Effects of Competing Organizational Facet-Specific Climates on Risky Safety Behaviors
Source: Int J Environ Res Public Health. 2020 May 17;17(10):3496. doi: 10.3390/ijerph17103496 (PMC7277467; doi:10.3390/ijerph17103496)
Supplement: Supplementary file 1 [file ijerph-17-03496-s001.pdf]

## Supplementary Materials

**Figure S1.** Flow Chart of the Study Process.

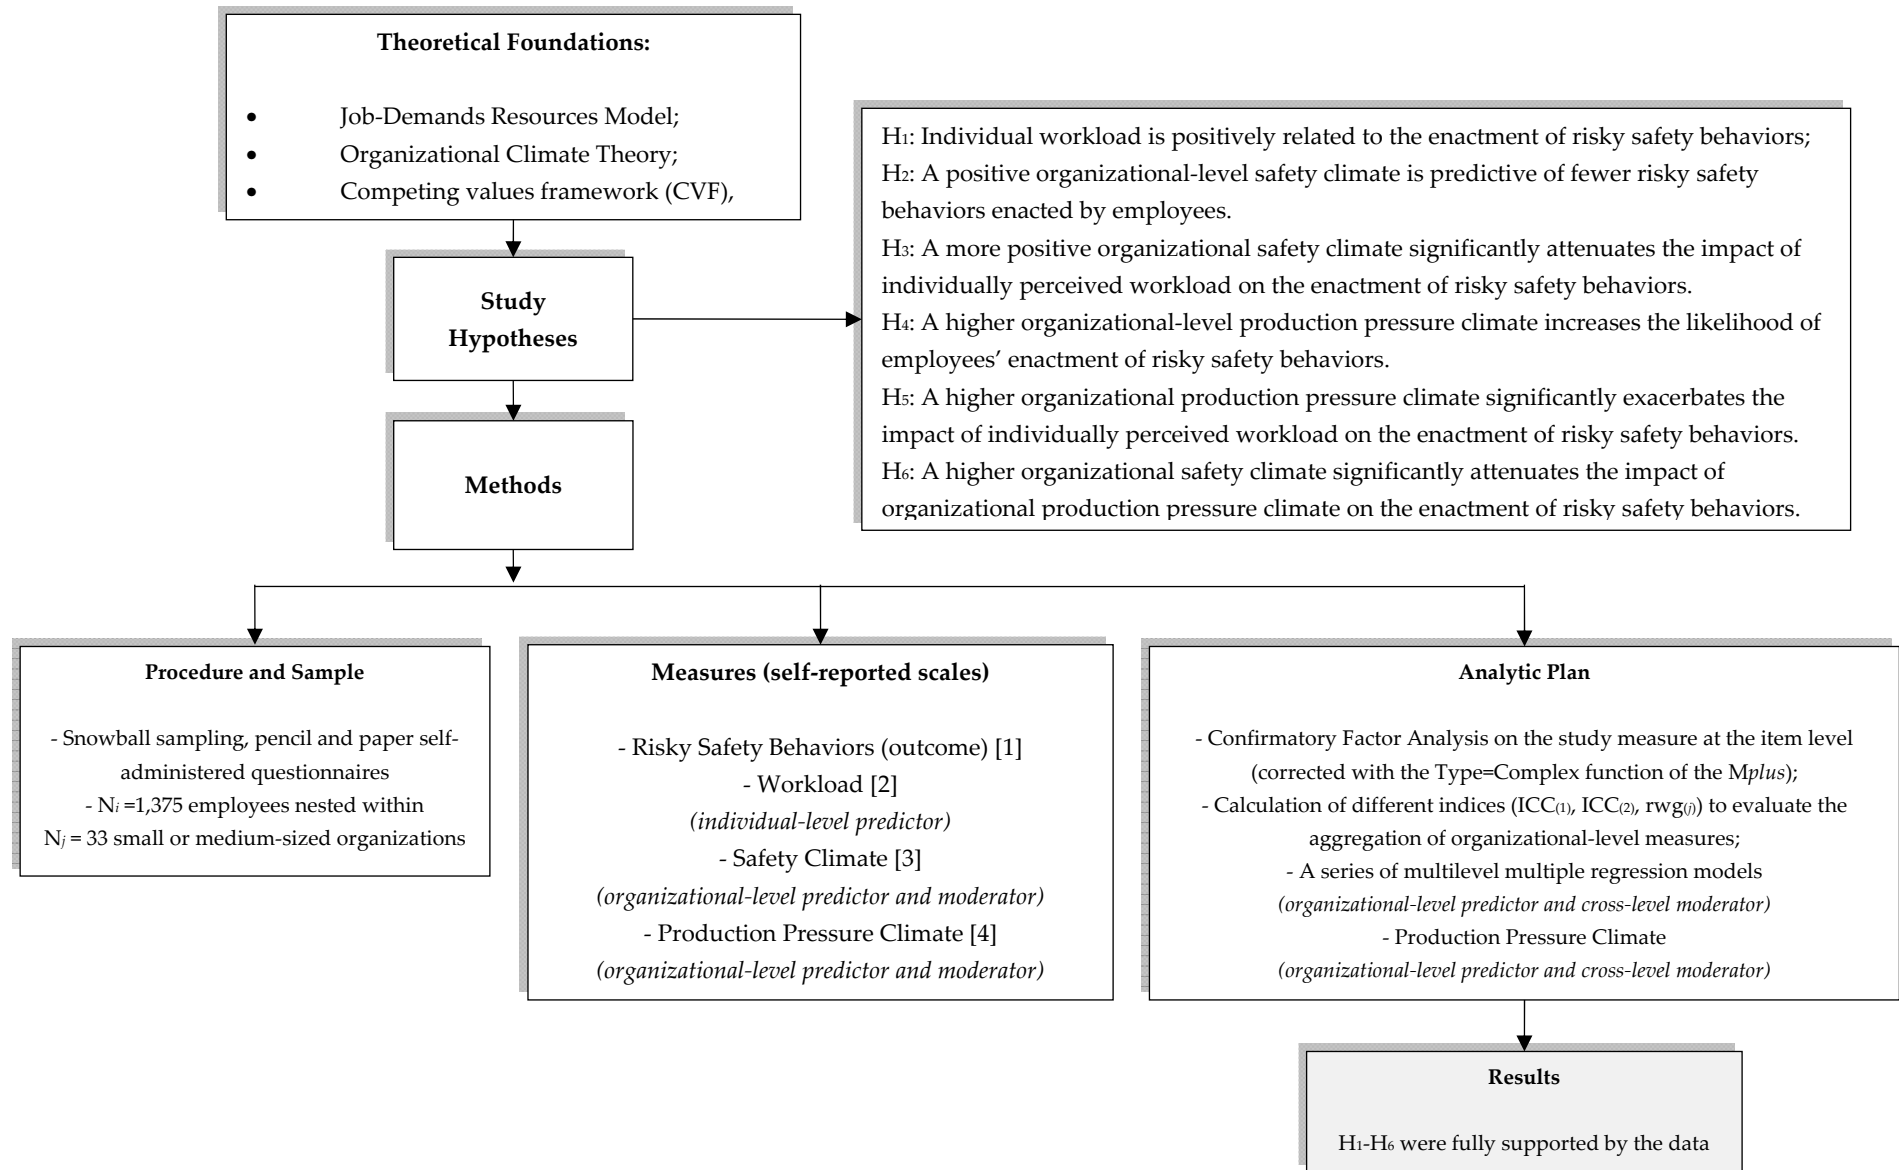

**Table S1.** List of Items Used for The Study Measures.

| <b>Risky Safety Behaviors [1]</b>      |                                                                                                          |
|----------------------------------------|----------------------------------------------------------------------------------------------------------|
| 1.                                     | Ignore safety regulations                                                                                |
| 2.                                     | Carry out forbidden activities                                                                           |
| 3.                                     | Cannot always perform work correctly                                                                     |
| 4.                                     | Take chances to get job done                                                                             |
| 5.                                     | Do not use protective equipment                                                                          |
| 6.                                     | Break procedures                                                                                         |
| <b>Workload [2]</b>                    |                                                                                                          |
| 1.                                     | How often does your job require you to work very fast?                                                   |
| 2.                                     | How often does your job require you to work very hard?                                                   |
| 3.                                     | How often does your job leave you with little time to get things done?                                   |
| 4.                                     | How often is there a great deal to be done?                                                              |
| 5.                                     | How often do you have to do more work than you can do well?                                              |
| <b>Safety Climate [3]</b>              |                                                                                                          |
| 1.                                     | Management is concerned for the safety of its employees                                                  |
| 2.                                     | Management places a strong emphasis on workplace health and safety                                       |
| 3.                                     | Safety is given a high priority by management                                                            |
| 4.                                     | Management considers safety to be important                                                              |
| 5.                                     | There is frequent communication about safety issues in your organization                                 |
| 6.                                     | Employees are able to discuss their concerns about safety issues with management                         |
| 7.                                     | There is sufficient opportunity to discuss and deal with safety issues in meetings                       |
| 8.                                     | There is open communication about safety issues within your organization                                 |
| 9.                                     | Employees are regularly consulted about workplace health and safety issues                               |
| 10.                                    | Safety issues are given a high priority in training programs                                             |
| 11.                                    | Workplace health and safety training cover the types of situations that employees encounter in their job |
| 12.                                    | Employees receive comprehensive training in workplace health and safety issues                           |
| 13.                                    | Employees have sufficient access to workplace health and safety training programs                        |
| 14.                                    | Safety procedures and practices are sufficient to prevent incidents occurring                            |
| 15.                                    | There are systematic procedures in place for preventing breakdowns in workplace safety                   |
| 16.                                    | The safety procedures and practices in your company are useful and effective                             |
| <b>Production Pressure Climate [4]</b> |                                                                                                          |
| 1.                                     | I sometimes need to compromise safety in order to meet production demands                                |
| 2.                                     | My job security is at risk if production demands are not met                                             |
| 3.                                     | I may be demoted or experience other negative job-related consequences if production demands are not met |
| 4.                                     | I experience workplace injuries due to production demands                                                |
| 5.                                     | The main focus of this organization is on production. Everything else is secondary                       |

## References

1. Rundmo, T. Associations between risk perception and safety. *Saf. Sci.* **1996**, *24*, 197–209, doi:10.1016/S0925-7535(97)00038-6.
2. Spector, P.E.; Jex, S.M. Development of four self-report measures of job stressors and strain: Interpersonal Conflict at Work Scale, Organizational Constraints Scale, Quantitative Workload Inventory, and Physical Symptoms Inventory. *J. Occup. Health Psychol.* **1998**, *3*, 356–367, doi:10.1037/1076-8998.3.4.356.
3. Neal, A.; Griffin, M.A.; Hart, P.M. The impact of organizational climate on safety climate and individual behavior. *Saf. Sci.* **2000**, *34*, 99–109, doi:10.1016/S0925-7535(00)00008-4.
4. Probst, T.M.; Graso, M. Pressure to produce=pressure to reduce accident reporting? *Accid. Anal. Prev.* **2013**, *59*, 580–587, doi:10.1016/j.aap.2013.07.020.
